1

2 ACCURATE DECODING OF THE SPINAL CORD OUTPUT IN HUMANS WITH  
3 IMPLANTED HIGH-DENSITY ELECTRODE ARRAYS

4 Silvia Muceli<sup>1</sup>, Wigand Poppendieck<sup>2</sup>, Aleš Holobar<sup>3</sup>,

5 Simon Gandevia<sup>4</sup>, David Liebetanz<sup>5</sup>, Dario Farina<sup>6</sup>

6 <sup>1</sup> Department of Electrical Engineering, Chalmers University of Technology, Gothenburg,  
7 Sweden

8 <sup>2</sup> Mannheim University of Applied Sciences, Mannheim, Germany

9 <sup>3</sup> Faculty of Electrical Engineering and Computer Science, University of Maribor, Maribor,  
10 Slovenia

11 <sup>4</sup> Neuroscience Research Australia and University of New South Wales, Randwick, Sydney,  
12 New South Wales, Australia

13 <sup>5</sup> Department of Neurology, University Medical Center Göttingen, Georg-August University,  
14 Göttingen, Germany

15 <sup>6</sup> Department of Bioengineering, Imperial College London, London, United Kingdom

16

17

18 Correspondence to Silvia Muceli ([muceli@chalmers.se](mailto:muceli@chalmers.se)) and Dario Farina

19 ([d.farina@imperial.ac.uk](mailto:d.farina@imperial.ac.uk))

20

21 Keywords: motor neurons, motor units, electrodes, coherence, connectivity, Renshaw cell,  
22 recurrent inhibition

## 23 ABSTRACT

24 Invasive electromyography opened a new window to explore motoneuron behaviour *in vivo*.  
25 However, the technique is limited by the small fraction of active motoneurons that can be  
26 concurrently detected, precluding a population analysis in natural tasks. Here, we developed a  
27 high-density intramuscular electrode for *in vivo* human recordings along with a fully  
28 automatic methodology that could detect the discharges of action potentials of up to 67  
29 concurrently active motoneurons with 99% accuracy. These data revealed that motoneurons  
30 of the same pool receive common synaptic input at frequencies up to 75 Hz and that late  
31 recruited motoneurons inhibit the discharges of those recruited earlier. These results  
32 constitute an important step in the population coding analysis of the human motor system *in*  
33 *vivo*.

## 34 INTRODUCTION

35 The introduction of intramuscular needles and wires for electromyography (EMG) by  
36 Adrian and Bronk (1929) and Basmajian and Stecko (1962) opened a window to explore the  
37 neural underpinning of movement control. By recording muscle fibre action potentials,  
38 intramuscular EMG reveals the timing of the action potentials discharged by the innervating  
39 spinal motoneurons (MN). The analysis of motor units (MUs) from intramuscular EMG  
40 decomposition rapidly became the standard approach to study MN behaviour *in vivo* in  
41 humans and other species (Desmedt, 1973).

42 Nonetheless, the use of EMG to assess MNs also imposes some constraints. Some  
43 intramuscular electrodes are highly selective to detect the electrical activity of a small  
44 number of muscle fibres. This makes it easy to identify the discharge times of a few MUs  
45 through EMG decomposition, which is conventionally based on spike sorting of action  
46 potentials with similar morphology (LeFever and De Luca, 1982). However, the electrode

47 selectivity implies that only a small fraction of the hundreds of active MNs can be studied  
48 concurrently. To increase the number of sampled MUs, investigators have serially recorded  
49 single MU activity. While serial recordings have unravelled patterns of MN firing, a MN  
50 population analysis is still missing, which limits our understanding of the process of  
51 generation of the neural output of the spinal cord. Currently, there is no robust method that  
52 provides simultaneous decoding of a large portion of the active MNs in natural tasks.

53         The identification of large populations of concurrently active MUs is necessary to  
54 characterise the synaptic inputs received by MNs. Coherence among spike trains of the  
55 homonymous MN pool reflects the common synaptic input at various frequency bands. A  
56 single MN cannot accurately sample an input with a frequency greater than half its average  
57 discharge rate (Lazar and Pnevmatikakis, 2008; Lazar and Tóth, 2004), which is usually in  
58 the range 10 - 40 Hz (Enoka and Fuglevand, 2001). As a result, sampling by few MNs limits  
59 the frequency range at which coherence (and thus common synaptic input) can be observed.  
60 However, as the common synaptic input is spread to the whole MN pool (Farina et al., 2014),  
61 pooling the spike trains extracted from large populations of MUs allows sampling at higher  
62 frequencies.

63         As a further example, analysis of the output of a population of MNs is also a way to  
64 investigate connectivity among MNs, e.g. due to Renshaw inhibition (Eccles et al., 1961;  
65 Renshaw, 1941). Renshaw cells receive collateral projections from MN axons and synapse on  
66 MNs mediating recurrent inhibition back to the MN pool. However, the distribution of  
67 recurrent inhibition throughout the MN pool is unknown in humans (Alvarez, 2019). Most  
68 knowledge about recurrent inhibition stems from experiments on anesthetized animal  
69 preparations, and direct translation of findings to human studies of intact MNs during natural  
70 behaviour is challenging. Again, technological advances for sampling large populations of  
71 MUs *in vivo* in humans are necessary (Alvarez, 2019).

72           A way to increase the number of concurrently detected MUs in natural tasks uses  
73 decomposition of activity recorded with high-density grids of surface electrodes (Holobar et  
74 al., 2009). However, surface EMG only detects the activity of superficial MUs (Farina et al.,  
75 2010). As an alternative approach to increase the number of sampled MUs, we previously  
76 introduced multichannel intramuscular electrodes based on thin-film technology (Farina et  
77 al., 2008; Muceli et al., 2015), which provide a large and unbiased sample of MUs from both  
78 deep and superficial muscles. These electrodes comprise a linear array of detection points in a  
79 flexible wire that can record across the muscle cross-section. Tens of MUs can be  
80 concurrently detected with these systems (Muceli et al., 2015). Yet, these systems are limited  
81 to only 16 electrode sites and they require partially manual spike sorting. Spike sorting  
82 software for multichannel intramuscular EMG indeed currently relies on human oversight to  
83 edit the results (McGill et al., 2005).

84           When increasing the number of recorded signals, the EMG decomposition process  
85 must be applied to each recorded EMG channel. With conventional spike sorting, this  
86 increases computation time as well as manual editing of the results (Enoka, 2019).  
87 Alternative to spike sorting, blind source separation (BSS) methods can be applied to separate  
88 sources (MUs) when a large number of observations (EMG channels) is available (Negro et  
89 al., 2016). However, classic BSS limits the maximum number of extracted sources to the  
90 number of observations (in practice to less than the observations).

91           Here, we describe two breakthroughs in the technology to investigate MN behaviour  
92 *in vivo*. First, we designed, manufactured and tested a novel implantable electrode array for  
93 human studies with a much greater number of recording sites and higher site density than any  
94 previous systems. The novel design allowed the implantation of the array acutely with  
95 needles of similar size to those used in conventional concentric needle recording. Second, we  
96 used a fully automatic decomposition algorithm (no manual editing) that enabled the

97 decoding of the high-density multiunit recordings with accuracy comparable to that achieved  
98 by extensive manual editing of each trace by an expert operator. Further, with this new  
99 technology, we addressed two fundamental open questions in MN physiology. We found that  
100 a MN pool receives common synaptic input is a frequency range up to 75 Hz, much greater  
101 than previously thought. We then analysed the effect of individual MU discharges on the MN  
102 population output to determine the connectivity among MNs.

## 103 RESULTS

### 104 *Intramuscular thin-film electrode array*

105 We designed and manufactured a high-density intramuscular array with 40 platinum  
106 electrodes of area  $5257 \mu\text{m}^2$  each (Fig. 1 A), linearly distributed over a 2-cm length. Figure  
107 1B shows the complete layout of the double-sided thin-film structure. The structure is built  
108 on a polyimide substrate, has a total length of 7 cm and is U-shaped with two filaments of  
109 width  $655 \mu\text{m}$  and  $150 \mu\text{m}$  (Fig. 1C), and thickness of  $20 \mu\text{m}$ . The wider filament contains  
110 two linear arrays of 20 oval electrodes each (Fig. 1A), with 1-mm inter-electrode distance on  
111 the top (cyan) and bottom (green) sides of the polyimide (Fig. 1C). The two arrays have a  
112 shift of 0.5 mm (Fig. 1C). Since the double-sided structure is only  $20\text{-}\mu\text{m}$  thick, it is  
113 equivalent to a linear array of electrodes with 0.5 mm inter-site distance. The number of  
114 electrodes is limited by the number of interconnection lines fitting on the filament. The  
115 advantage of two arrays on the two sides of the structure is that the filament width can be  
116 reduced for a given number of electrodes. Also, the occurrence of short-circuits during  
117 manufacturing is reduced. The narrower filament is inserted into a 25-gauge needle (100  
118 Sterican, B. Braun, Melsungen, Germany), to introduce the thin-film structure into a muscle,  
119 with a procedure similar to that used in classic fine wire EMG. The needle is withdrawn  
120 leaving the array inside the muscle.

121 [FIGURE 1]

122 *Signal quality and motor unit yield*

123 The electrode array was tested in three healthy men (S1-S3). Two arrays were inserted  
124 in the tibialis anterior of subject S1, while one array was implanted in the other two subjects.  
125 S1 performed a steady contraction at 20% of maximal force (MVC), whereas S2 and S3  
126 contracted the tibialis at 30% MVC. The electrodes recorded high quality signals, with a  
127 baseline noise of  $15.8 \pm 9.9 \mu\text{V}$  (average  $\pm$  standard deviation across 4 arrays of 40 channels  
128 each). Figure 1D displays representative signals recorded from S1 to show the signal-to-noise  
129 ratio. Figure 1E shows the firing patterns of the MUs extracted via manual decomposition  
130 from the signals recorded from array1 in S1. In the raster plot, each row represents a different  
131 MU, and each vertical line the discharge of an action potential. Within the selected time  
132 frame (5 s), 45 MUs were consistently active, 1 MU was recruited during the contraction and  
133 1 had a few isolated discharges. Figure 3F shows a representative example of a MU action  
134 potential detected across several electrodes of the 40-channel array.

135 The recorded signals were decomposed independently into the constituent MU action  
136 potential trains by two expert investigators (SM and AH). We refer to the two decomposition  
137 processes as manual and automatic decomposition. For manual decomposition, intramuscular  
138 EMG signals from each thin-film system were decomposed channel by channel using spike  
139 sorting software (McGill et al., 2005), manually edited for resolving missed discharges and  
140 superimpositions, and merged (after resolving differences in the discharge patterns of the  
141 same MU extracted from different channels) so that each MU's activity was represented by a  
142 unique firing pattern. For automatic decomposition, all signals from the same array were  
143 decomposed with the BSS method (see Methods and Holobar and Zazula (2007)). We then

144 compared the MU firing patterns extracted by the two decomposition procedures (manual and  
145 automatic) via the rate of agreement (RoA).

146 Table 1 reports the data obtained via the decomposition process. The activity of 161  
147 MUs was manually decomposed from the signals recorded from the 4 arrays, yielding 38735  
148 unique discharges in 20 s. The RoA between all possible pairs of MUs detected from the  
149 same array (1225, 630, 741, 630, for S1 array1, S1 array2, S2, and S3, respectively) ranged  
150 from 0 to 11%, confirming that all identified MU spike trains had few common discharges,  
151 i.e., they were unique. The number of channels in which the peak-to-peak amplitude of the  
152 corresponding action potential exceeded 10 times the RMS baseline noise ranged from 4 to  
153 40 (median 18) for all MUs but 3 (148 MUs in total). The presence of the same MU over  
154 multiple channels contributed to the accurate extraction of the MU firing patterns (Mambrito  
155 and De Luca, 1984). The average firing rate was  $14.8 \pm 1.7$ ,  $11.0 \pm 1.2$ , and  $12.7 \pm 1.9$  Hz for  
156 S1-3, in agreement with previous studies (Connelly et al., 1999; Erim et al., 1996). Most  
157 MUs were active for the whole 20 s interval, but 10 of 161 fired less than 50 times each and  
158 were excluded from the calculation of the average firing rate and number of channels  
159 exceeding baseline to increase the reliability of the estimates. There were no MUs in common  
160 between array1 and array2 of S1 (RoA between all possible pairs (1800) ranged between 0  
161 and 5%). The cross-spike triggered averaging procedures produced averages at the baseline  
162 noise level, further confirming that there were no MUs in common between array1 and  
163 array2.

164 [TABLE 1]

165 *Decomposition accuracy*

166 The manual decomposition of each channel (20-s recording) took >8h by the expert  
167 operator. The fully automatic decomposition of each array (40 channels, 22 s) took 2h and 9

168 min of computational time on average across the 4 arrays (Intel CORE i9 vPro 9Gen  
169 Processor with 32 GB RAM). Table 1 includes the comparison between the output of the  
170 manual and automatic decomposition procedures. About 80% of the MUs identified by  
171 manual decomposition were identified by the automatic decomposition. Only one MU  
172 identified by automatic BSS did not match a MU extracted by manual decomposition. The  
173 investigator who performed the manual decomposition initially identified the unmatched MU,  
174 but she discarded it from further analysis because of lack of confidence in the decomposition  
175 accuracy due to the low amplitude of its action potentials. Eight MUs that were not extracted  
176 by the automatic decomposition (21%) fired less than 50 times.

177         The average RoA across the 123 MU spike trains that were identified by both  
178 procedures (manual and automatic) was  $99 \pm 3\%$ . Of those 123 spike trains, 64 matched the  
179 automatic results with a 100% RoA, and 36 had a  $\text{RoA} \geq 99\%$ . We inspected the  
180 disagreement between the output of the two procedures and found that only 3 common MUs  
181 had a RoA in the range 80 to 85% due to misalignments in discharge timings which was  
182 greater than our strict threshold of 0.5 ms. One of the three MUs had a satellite action  
183 potential. Among the common MUs, 16 discharges identified by the manual decomposition  
184 and missed by the automatic decomposition were doublets.

185         Taken together, these results indicate that the high-density intramuscular array yields  
186 high MU sampling and the activity of most of the MUs can be reliably extracted by a fully  
187 automatic procedure with comparable accuracy to manual decomposition.

### 188 *Motor unit population coherence*

189         We calculated the coherence between groups of MUs of increasing numerosity (Fig.  
190 2). Figure 2A shows 20 s of spike trains extracted from S1. Figure 2B shows the  
191 corresponding coherence for groups of MUs between 1 and 34. The coherence was



192 statistically significant (i.e., above the 95% confidence level) for frequencies of about 75 Hz,  
193 proving that the synaptic input bandwidth goes well beyond the  $\beta$  band. Similarly, the  
194 coherence was still significant at ~75 Hz for S3 (Fig. 2D). In both cases, an increase of  
195 coherence in the gamma band with the number of MUs is clear. On the contrary, for S2, the  
196 coherence bandwidth was limited to 40 Hz (Fig. 2C).

197 [FIGURE 2]

198 *Reciprocal effect of motoneuron discharges on the homonymous pool*

199 The discharge of a MN depends on supraspinal and spinal inputs, including from  
200 interneurons. A particular class of interneurons, the Renshaw cells, cause recurrent inhibition  
201 of the homonymous MN pool (Hultborn et al., 1979). Renshaw cells are facilitated during  
202 weak and inhibited during strong contractions (Hultborn and Pierrot - Deseilligny, 1979). We  
203 expected to see the effects of reciprocal inhibition in our recordings when the subject exerted  
204 forces of 20 or 30% MVC. As there are opposing views on the distribution of recurrent  
205 inhibition between early- and late-recruited MUs within the same MN pool (Granit et al.,  
206 1957; Haase et al., 1975; Hultborn et al., 1988), we separately investigated higher and lower  
207 threshold MUs. Results are reported in Fig. 3 as synchronization cross-histograms. Firing rate  
208 was considered a surrogate of recruitment order, in that early recruited MUs discharge faster,  
209 at a given moderate level of force, than those recruited later (De Luca and Erim, 1994). As  
210 can be observed in both S1 and S3, late recruited MNs caused more inhibition of the  
211 discharges of the early recruited MNs at ~15 ms (dip in Fig. 3 A and C) than the converse.  
212 On the other hand, for S2 (Fig. 3B), inhibition continued up to ~40 ms. No dips were  
213 observed in the cross-histograms obtained by applying different perturbations (see  
214 METHODS, Connectivity among motoneurons) to the original firing patterns and

215 maintaining the firing rate unchanged (control condition; results not shown), implying that  
216 the latter did not influence the results presented.

217 [FIGURE 3]

## 218 DISCUSSION

219 We have presented the development of a high-density electrode array for  
220 intramuscular recordings that enables the automatic accurate extraction of tens of MUs  
221 concurrently active. We have shown representative examples of MU population analysis  
222 enabled by our system.

### 223 *Intramuscular array*

224 Our electrode array configuration consists of polymer (Hassler et al., 2011) and metal  
225 that are micromachined (Stieglitz et al., 2000) into a thread containing 40 electrodes. The  
226 materials and minimal thickness (20  $\mu\text{m}$ ) confer the required flexibility to interface the  
227 muscle without being unpleasant for the subject. Each electrode has an area of 5257  $\mu\text{m}^2$ .  
228 Such small electrodes inevitably present high electrical impedance which reduces the signal-  
229 to-noise ratio. The contacts were therefore coated with microrough platinum that increases  
230 the active surface and reduces the impedance by 10 times compared to an untreated electrode  
231 (Muceli et al., 2015, 2019). The array has electrodes manufactured on both sides of the  
232 substrate (Poppendieck et al., 2015) to enable increased spatial resolution and to reduce the  
233 likelihood of short-circuits. This improvement in the technology allowed us to build 40  
234 electrodes in a 2-cm long filament.

### 235 *Motor unit decomposition*

236 Four intramuscular electrode arrays were tested in 3 subjects. Electrodes were inserted  
237 into the tibialis anterior and used to acquire EMG during isometric contractions at moderate

238 force. Each array yielded an average number of 40 concurrently active MUs. Eighty-six MUs  
239 could be extracted from a contraction at 20% MVC with two high-density electrode arrays in  
240 S1. Given that the tibialis anterior is assumed to comprise about 450 MUs (Enoka, 1995) and  
241 the relatively low muscle force exerted by S1, the identified 86 MUs represent a relative large  
242 proportion of those that were active during the contraction.

243         On average, 31 MUs per array could be automatically decomposed with an accuracy  
244 of 99% when compared with manual expert decomposition. Compared to previous systems  
245 with fewer electrodes (Muceli et al., 2015), the number of automatically extracted MUs with  
246 the proposed high-density electrode is 2 to 3 times greater and the accuracy substantially  
247 higher (Negro et al., 2016). For example, our previous attempt at automatic decomposition of  
248 EMG recorded with two arrays of 16 channels each yielded 22 out of 53, 24 of out 57, and 21  
249 out of 60 (i.e., about 40%) manually detected MUs at different force levels, with an average  
250 RoA of 94%. Our high-density system enabled automatic decomposition of about 80% of the  
251 manually detected MUs action potential trains constituting the interference EMG with a 99%  
252 RoA. Eight MUs identified by manual decomposition discharged less than 50 times, which  
253 was insufficient for the automatic identification. The yield of MUs per channel was also  
254 superior to that achieved by BSS of high-density surface EMG data from the tibialis anterior  
255 (21 MUs/64 channels) (Del Vecchio et al., 2020) that in any case can only detect MUs with  
256 large action potentials at the skin surface.

257         The automatic decomposition was validated against the manually decomposed  
258 dataset. The RoA between the two procedures was 99% on average (across 123 MUs). This  
259 value is remarkably high and can be attributed to the high-density of channels. The  
260 comparison between the two decomposition procedures is a conservative approach for  
261 estimating accuracy. As signals were decomposed independently by two decomposition  
262 methods and operators, the likelihood that the same mistake is made in the two cases is very

263 low (Mambrito and De Luca, 1984). Therefore, the procedure of validation of the automatic  
264 decomposition in this study is robust. In addition, the average pulse-to-noise ratio across the  
265 124 MUs automatically extracted was 42 dB, greater than values reported for surface EMG  
266 decomposition (Holobar et al., 2014), further confirming the high accuracy of the automatic  
267 decomposition procedure.

268 We inspected the disagreement between the two decomposition procedures, and we  
269 identified two sources of errors (doublets and misalignments). Some of the doublets could not  
270 be identified by the automatic BSS decomposition. This is to be expected as doublets may  
271 have an action potential with smaller amplitude compared to the main action potential when  
272 the second input (forming the doublet) arrives at the end-plate before the muscle had fully  
273 recovered (Denslow, 1948). As the BSS algorithm can only identify action potentials with  
274 similar shape, a decrease in amplitude prevented the BSS from associating the doublet to the  
275 same MU as the main action potential. Nonetheless, an adaptive change in threshold for  
276 detection may in the future solve this problem.

277 Three MUs found by both decomposition procedures had misalignment for discharges  
278  $>0.5$  ms and this influenced the RoA for those MUs. These misalignments are not necessarily  
279 errors. The MU action potential train detected at a certain electrode produces time-locked  
280 trains in other electrodes that fall in that MU territory, but can also exhibit some jitter from  
281 discharge to discharge due to fluctuations in muscle fiber conduction velocity (Stålberg and  
282 Sonoo, 1994). In retaining only one firing pattern per MU, we discarded this information on  
283 the jitter. Also, one of the three MUs had a satellite potential which showed some size and  
284 temporal jitter. The two algorithms may have used either the main potential or the satellite  
285 potential as a reference for the alignment, which may then cause misalignments. Note that the  
286 results of the automatic decomposition did not undergo any post-processing. Otherwise, some

287 mistakes could have been easily corrected by plotting the firing rate against time to detect any  
288 inconsistencies.

289 Finally, this work validated for the first time BSS decomposition on a very large  
290 number of MUs. Previous validation via comparison between surface and intramuscular data  
291 was limited to an average of 1 MU per contraction commonly found in the two datasets  
292 (Holobar et al., 2010). In this study, rather than two datasets, we compared the decomposition  
293 performance when the same signals were independently analysed by two operators using two  
294 different procedures. The total number of common MUs was 123, i.e., 31 per electrode array.

#### 295 *MU population coherence*

296 Our coherence analysis showed that the synaptic input common to the MN pool may  
297 have frequency content up to 75 Hz (Fig. 2 B and D) and that the estimated coherence  
298 increases with the number of MUs included in the analysis. Therefore, large populations of  
299 concurrently active MUs are necessary to infer characteristics of the neural drive. For a  
300 certain frequency of the synaptic input to be detected as common (i.e., statistically significant  
301 in the coherence plot), the synaptic input has to be sampled at least twice as fast as that  
302 frequency component (Lazar and Pnevmatikakis, 2008). Each MN integrates the supraspinal  
303 and afferent inputs and discharges an action potential when the net input exceeds the  
304 recruitment threshold. Under the assumption of a common input uniformly distributed to the  
305 whole MN pool (Farina et al., 2014), the effective sampling frequency of the synaptic input is  
306 the cumulative frequency of all active MNs, i.e. the frequency of the spike train obtained  
307 pooling all spike trains together. In voluntary sustained contractions, a MN usually discharges  
308 less than 40 action potentials per second (Enoka and Fuglevand, 2001). As a result, sampling  
309 by few MNs limits the maximal frequency of the signal recorded from the output of the spinal

310 cord, while large populations allow the synaptic input to be reconstructed more accurately  
311 from the MN output.

312         The very large frequency content identified for the neural drive from the spinal cord  
313 to muscles is unexpected as muscles can only contract within a narrow bandwidth (<10 Hz)  
314 (Baldissera et al., 1998). The issue of the mismatch between the bandwidth of the neural  
315 drive and of the muscle dynamics has been previously discussed in relation to the  $\beta$  band  
316 (Watanabe and Kohn, 2015). It has long been known that beta oscillations are present in MN  
317 output (Ibáñez et al., 2021) while they are filtered out by the muscle contractile properties.  
318 The new observation of a much greater frequency content than the  $\beta$  oscillations indicates the  
319 variety of common inputs received by the MN pool. Gamma-range cortico-muscular  
320 coherence has been observed during strong isometric voluntary contractions (Ushiyama et al.,  
321 2012), and during dynamic contractions (Andrykiewicz et al., 2007), suggesting that the  
322 gamma-band rhythmic drive from the cortex contributes, at least in part, to the EMG activity  
323 at that frequency band. Our results show that human muscles can manifest rhythmic electrical  
324 oscillations in the gamma-band also during low intensity isometric contractions.

### 325 *Reciprocal influence of motoneuron discharges onto the homonymous pool*

326         Our study included the analysis of the influence of the discharges of early recruited  
327 MUs on those recruited later (Fig. 3, R1  $\rightarrow$  R2) and vice versa (Fig. 3, R2  $\rightarrow$  R1). We  
328 observed that the highest value of the six cross-histograms was obtained at 0 s, indicating the  
329 common drive received by the MN pool (De Luca and Erim, 1994). Early recruited MUs  
330 were less likely to fire for about 15 ms (Fig. 3A and C, S1 and S3, R2  $\rightarrow$  R1) or 40 ms (Fig.  
331 3B, S2, R2  $\rightarrow$  R1) after the discharge of later recruited MUs. This observation fits with  
332 recurrent inhibition by Renshaw cells which occurs with similar timing (Bhumbra et al.,  
333 2014). Recurrent inhibition has been studied in isolated cells in *in vitro* experiments or in

334 anesthetized animal preparations. The main method to test homonymous recurrent inhibition  
335 in humans is indirect and relies on changes in H-reflex modulation caused by presumed  
336 recurrent effects (Pierrot-Deseilligny and Burke, 2005). An elegant method to evaluate  
337 recurrent inhibition in humans at individual MN level has been proposed by Özyurt et al.  
338 (2019). However, this method can only be used to assess the impact of the largest on smaller  
339 MUs as it evaluates the effect of electrical stimulation on the background firing of small  
340 MUs. On the contrary, our method can be applied in both directions across the MN pool  
341 during voluntary contractions. Özyurt et al. (2019) reported an average latency for recurrent  
342 inhibition of 37.7 ms from a peripheral stimulus for the soleus muscle, which is compatible  
343 with the dips at ~ 40 ms visible in the cross-histograms of S2 (Fig. 3B). For S1 and S3,  
344 inhibition occurred earlier than for S2 (Fig. 3A and C).

345         In conclusion, we present a novel high-density intramuscular array along with a  
346 methodology that fully automatically identifies the spike trains of relatively large number of  
347 MUs, unveiling new knowledge behind MN population coding. We demonstrated that the  
348 number of automatically identified MUs is high enough to reveal the presence of significant  
349 coherence between groups of MNs in the frequency range up to 75 Hz and the effect of  
350 Renshaw inhibition on the homonymous MN pool. These results constitute an important step  
351 forward in the *in vivo* population coding analysis of the human motor system.

## 352 ACKNOWLEDGEMENTS

353         The authors would like to thank Marco Beato and Rob Brownstone, University  
354 College London, for useful discussion.

355 REFERENCES

- 356 Adrian, E.D., and Bronk, D.W. (1929). The discharge of impulses in motor nerve fibres. Part  
357 II. The frequency of discharge in reflex and voluntary contractions. *J. Physiol.* *67*, 119–151.
- 358 Alvarez, F.J. (2019). A motor physiology recurrent topic: simplify assumptions to gain extra  
359 insight. *J. Physiol.* *597*, 2117–2118.
- 360 Andrykiewicz, A., Patino, L., Naranjo, J.R., Witte, M., Hepp-Reymond, M.C., and Kristeva,  
361 R. (2007). Corticomuscular synchronization with small and large dynamic force output. *BMC*  
362 *Neurosci.* *8*, 1–12.
- 363 Baldissera, F., Cavallari, P., and Cerri, G. (1998). Motoneuronal pre-compensation for the  
364 low-pass filter characteristics of muscle. A quantitative appraisal in cat muscle units. *J.*  
365 *Physiol.* *511*, 611–627.
- 366 Basmajian, J., and Stecko, G. (1962). A new bipolar electrode for electromyography. *J. Appl.*  
367 *Physiol.* *17*, 849.
- 368 Bhumbra, G.S., Bannatyne, B.A., Watanabe, M., Todd, A.J., Maxwell, D.J., and Beato, M.  
369 (2014). The recurrent case for the Renshaw cell. *J. Neurosci.* *34*, 12919–12932.
- 370 Connelly, D.M., Rice, C.L., Roos, M.R., and Vandervoort, A.A. (1999). Motor unit firing  
371 rates and contractile properties in tibialis anterior of young and old men. *J. Appl. Physiol.* *87*,  
372 843–852.
- 373 Denslow, J.S. (1948). Double discharges in human motor units. *J. Neurophysiol.* *11*, 209–  
374 215.
- 375 Desmedt, J. (1973). *New developments in electromyography and clinical neurophysiology*  
376 (Basel: S Karger AG).



- 377 Eccles, J.C., Eccles, R.M., Iggo, A., and Lundberg, A. (1961). Electrophysiological  
378 investigation of Renshaw cells. *Electrophysiol. Investig. Renshaw Cells 159*, 461–478.
- 379 Enoka, R.M. (1995). Morphological features and activation patterns of motor units. *J. Clin.*  
380 *Neurophysiol. 12*, 538–559.
- 381 Enoka, R.M. (2019). Physiological validation of the decomposition of surface EMG signals.  
382 *J. Electromyogr. Kinesiol. 46*, 70–83.
- 383 Enoka, R.M., and Fuglevand, A.J. (2001). Motor unit physiology: some unresolved issues.  
384 *Muscle Nerve 24*, 4–17.
- 385 Erim, Z., De Luca, C.J., Mineo, K., and Aoki, T. (1996). Rank-ordered regulation of motor  
386 units. *Muscle and Nerve 19*, 563–573.
- 387 Farina, D., Arendt-Nielsen, L., Merletti, R., and Graven-Nielsen, T. (2002). Assessment of  
388 single motor unit conduction velocity during sustained contractions of the tibialis anterior  
389 muscle with advanced spike triggered averaging. *J. Neurosci. Methods 115*, 1–12.
- 390 Farina, D., Yoshida, K., Stieglitz, T., and Koch, K.P. (2008). Multichannel thin-film  
391 electrode for intramuscular electromyographic recordings. *J. Appl. Physiol. 104*, 821–827.
- 392 Farina, D., Holobar, A., Merletti, R., and Enoka, R.M. (2010). Decoding the neural drive to  
393 muscles from the surface electromyogram. *Clin. Neurophysiol. 121*, 1616–1623.
- 394 Farina, D., Negro, F., and Dideriksen, J.L. (2014). The effective neural drive to muscles is the  
395 common synaptic input to motor neurons. *J. Physiol. 592*, 3427–3441.
- 396 Granit, R., Pascoe, J.E., and Steg, G. (1957). The behaviour of tonic  $\alpha$  and  $\beta$  motoneurones  
397 during stimulation of recurrent collaterals. *J. Physiol. 138*, 381–400.
- 398 Haase, J., Cleveland, S., and Ross, H.G. (1975). Problems of postsynaptic autogenous and

- 399 recurrent inhibition in the mammalian spinal cord. *Rev. Physiol. Biochem. Pharmacol.* *73*,  
400 73–129.
- 401 Hassler, C., Boretius, T., and Stieglitz, T. (2011). Polymers for neural implants. *J. Polym.*  
402 *Sci. Part B Polym. Phys.* *49*, 18–33.
- 403 Holobar, A., and Zazula, D. (2007). Multichannel blind source separation using convolution  
404 kernel compensation. *IEEE Trans. Signal Process.* *55*, 4487–4496.
- 405 Holobar, A., Farina, D., Gazzoni, M., Merletti, R., and Zazula, D. (2009). Estimating motor  
406 unit discharge patterns from high-density surface electromyogram. *Clin. Neurophysiol.* *120*,  
407 551–562.
- 408 Holobar, A., Minetto, M.A., Botter, A., Negro, F., and Farina, D. (2010). Experimental  
409 analysis of accuracy in the identification of motor unit spike trains. *IEEE Trans. Neural Syst.*  
410 *Rehabil. Eng.* *18*, 221–229.
- 411 Holobar, A., Minetto, M.A., and Farina, D. (2014). Accurate identification of motor unit  
412 discharge patterns from high-density surface EMG and validation with a novel signal-based  
413 performance metric. *J. Neural Eng.* *11*, 016008.
- 414 Hultborn, H., and Pierrot-Deseilligny, E. (1979). Changes in recurrent inhibition during  
415 voluntary soleus contractions in man studied by an H-reflex technique. *J. Physiol.* *297*, 229–  
416 251.
- 417 Hultborn, H., Lindström, S., and Wigström, H. (1979). On the function of recurrent inhibition  
418 in the spinal cord. *Exp. Brain Res.* *37*, 399–403.
- 419 Hultborn, H., Katz, R., and Mackel, R. (1988). Distribution of recurrent inhibition within a  
420 motor nucleus. II. Amount of recurrent inhibition in motoneurons to fast and slow units.

- 421 Acta Physiol. Scand. *134*, 363–374.
- 422 Ibáñez, J., Del Vecchio, A., Rothwell, J.C., Baker, S.N., and Farina, D. (2021). Only the  
423 fastest corticospinal fibers contribute to  $\beta$  corticomuscular coherence. *J. Neurosci.* *41*, 4867–  
424 4879.
- 425 Lazar, A.A., and Pnevmatikakis, E.A. (2008). Faithful representation of stimuli with a  
426 population of integrate-and-fire neurons. *Neural Comput.* *20*, 2715–2744.
- 427 Lazar, A.A., and Tóth, L.T. (2004). Perfect recovery and sensitivity analysis of time encoded  
428 bandlimited signals. *IEEE Trans. Circuits Syst. I Regul. Pap.* *51*, 2060–2073.
- 429 LeFever, R.S., and De Luca, C.J. (1982). A procedure for decomposing the myoelectric  
430 signal into its constituent action potentials - Part I: technique, theory, and implementation.  
431 *IEEE Trans. Biomed. Eng. BME-29*, 149–157.
- 432 De Luca, C.J., and Erim, Z. (1994). Common drive of motor units in regulation of muscle  
433 force. *Trends Neurosci.* *17*, 299–305.
- 434 Mambrito, B., and De Luca, C.J. (1984). A technique for the detection, decomposition and  
435 analysis of the EMG signal. *Electroencephalogr. Clin. Neurophysiol.* *58*, 175–188.
- 436 McGill, K.C., Lateva, Z.C., and Marateb, H.R. (2005). EMGLAB: An interactive EMG  
437 decomposition program. *J. Neurosci. Methods* *149*, 121–133.
- 438 Muceli, S., Poppendieck, W., Negro, F., Yoshida, K., Hoffmann, K.P., Butler, J.E., Gandevia,  
439 S.C., and Farina, D. (2015). Accurate and representative decoding of the neural drive to  
440 muscles in humans with multi-channel intramuscular thin-film electrodes. *J. Physiol.* *593*,  
441 3789–3804.
- 442 Muceli, S., Poppendieck, W., Hoffmann, K.P., Dosen, S., Benito-León, J., Barroso, F.O.,

- 443 Pons, J.L., and Farina, D. (2019). A thin-film multichannel electrode for muscle recording  
444 and stimulation in neuroprosthetics applications. *J. Neural Eng.* *16*, 026035.
- 445 Negro, F., Muceli, S., Castronovo, A.M., Holobar, A., and Farina, D. (2016). Multi-channel  
446 intramuscular and surface EMG decomposition by convolutive blind source separation. *J.*  
447 *Neural Eng.* *13*, 026027.
- 448 Özyurt, M.G., Piotrkiewicz, M., Topkara, B., Weisskircher, H.W., and Türker, K.S. (2019).  
449 Motor units as tools to evaluate profile of human Renshaw inhibition. *J. Physiol.* *597*, 2185–  
450 2199.
- 451 Pierrot-Deseilligny, E., and Burke, D. (2005). Recurrent inhibition. In *The Circuitry of the*  
452 *Human Spinal Cord*, (New York: Cambridge University Press), pp. 151–196.
- 453 Poppendieck, W., Sossalla, A., Krob, M.O., Welsch, C., Nguyen, T.A.K., Gong, W.,  
454 DiGiovanna, J., Micera, S., Merfeld, D.M., and Hoffmann, K.P. (2014). Development,  
455 manufacturing and application of double-sided flexible implantable microelectrodes. *Biomed.*  
456 *Microdevices* *16*, 837–850.
- 457 Poppendieck, W., Muceli, S., Dideriksen, J., Rocon, E., Pons, J.L., Farina, D., and Hoffmann,  
458 K.P. (2015). A new generation of double-sided intramuscular electrodes for multi-channel  
459 recording and stimulation. *Proc. Annu. Int. Conf. IEEE Eng. Med. Biol. Soc. EMBS 2015-*  
460 *Novem*, 7135–7138.
- 461 Renshaw, B. (1941). Influence of discharge of motoneurons upon excitation of neighboring  
462 motoneurons. *J. Neurophysiol.* *4*, 167–183.
- 463 Stålberg, E. V., and Sonoo, M. (1994). Assessment of variability in the shape of the motor  
464 unit action potential, the “jiggle,” at consecutive discharges. *Muscle Nerve* *17*, 1135–1144.

- 465 Stieglitz, T., Beutel, H., Schuettler, M., and Meyer, J.-U. (2000). Micromachined, polyimide-  
466 based devices for flexible neural interfaces. *Biomed. Microdevices* 2, 283–294.
- 467 Ushiyama, J., Masakado, Y., Fujiwara, T., Tsuji, T., Hase, K., Kimura, A., Liu, M., and  
468 Ushiba, J. (2012). Contraction level-related modulation of corticomuscular coherence differs  
469 between the tibialis anterior and soleus muscles in humans. *J. Appl. Physiol.* 112, 1258–1267.
- 470 Del Vecchio, A., Holobar, A., Falla, D., Felici, F., Enoka, R.M., and Farina, D. (2020).  
471 Tutorial: Analysis of motor unit discharge characteristics from high-density surface EMG  
472 signals. *J. Electromyogr. Kinesiol.* 53, 102426.
- 473 Watanabe, R.N., and Kohn, A.F. (2015). Fast oscillatory commands from the motor cortex  
474 can be decoded by the spinal cord for force control. *J Neurosci* 35, 13687–13697.

475 FIGURE CAPTIONS

476 FIGURE 1: Design of the double-sided electrode array and representative recordings. (A)  
477 Close-up of an oval electrode. (B) Whole structures with the tracks running towards the  
478 connection pad. (C) Close-up of the electrode array tip. Electrodes represented in cyan are  
479 located on the top side of the thin-film array and those in green are located on the bottom side  
480 of the wider filament. (D) Representative recordings obtained from the tibialis anterior of S1  
481 during a contraction at 20% of the maximal force (MVC). (E) Firing pattern of 45 MUs  
482 extracted from the signal shown in D. (F) Multichannel action potentials of a representative  
483 motor unit obtained by averaging the red-coloured EMG channels in panel D with the firing  
484 pattern of the same colour in panel E as a trigger.

485 FIGURE 2. Coherence between populations of motor units. (A) Firing pattern of 68 motor  
486 units active during 20 MVC contraction (S2, 2 arrays). Coherence between combinations of  
487 cumulative spike trains (CSTs) obtained by pooling an increasing number of motor units  
488 from subject S1 (B), S2 (C), and S3 (D). Black dashed horizontal line is the 95% confidence  
489 limit. Coherence increased with the motor unit numerosity and the population coherence was  
490 significant up to 40 Hz in S2, and up to 75 Hz in S1 and S3, respectively. Note: 60 s of data  
491 were used for S1, 20 s for S2 and S3.

492 FIGURE 3. Analysis of motor unit synchronization for subjects S1 (A), S2 (B), and S3 (C).  
493 Left panels show the average discharge rate of the motor units in a 20 s time interval. Central  
494  $R1 \rightarrow R2$  ( $R2 \rightarrow R1$ ) panels display the influence of earlier (later) recruited motor units on  
495 the discharge timing of the later (earlier) recruited motor units via cross-histograms between  
496 pairs of motor unit spike trains. The two rightmost columns represent the same values in  
497 logarithmic scale so that the inhibition can be more readily visualised.

498 TABLE 1: Decomposition performance for the high-density intramuscular signals: manual  
499 versus automatic decomposition

| ID        | Number of MUs (manual) | Number of MUs (automatic) | Number of MUs (common) | RoA (mean $\pm$ SD, %) | PNR (automatic, dB) |
|-----------|------------------------|---------------------------|------------------------|------------------------|---------------------|
| S1 array1 | 50                     | 40                        | 39                     | 99 $\pm$ 3             | 40.5 $\pm$ 7.4      |
| S1 array2 | 36                     | 27                        | 27                     | 98 $\pm$ 4             | 41.1 $\pm$ 6.7      |
| S2        | 39                     | 27                        | 27                     | 100 $\pm$ 1            | 42.0 $\pm$ 5.3      |
| S3        | 36                     | 30                        | 30                     | 99 $\pm$ 4             | 44.9 $\pm$ 8.5      |

500 MU: motor unit; RoA: rate of agreement; SD: standard deviation; PNR: pulse to noise ratio

501 METHODS

502 *Manufacturing process*

503 The thin-film electrode array structure was built using microfabrication processes.

504 The electrode array was built over a silicon wafer used as a platform for the production. The

505 structure was built layer by layer with layers of metal for tracks sandwiched between three

506 layers of polyimide. Metals were patterned using a photolithography process.

507 First, a platinum etch mask was deposited and lift-off structured on a 4 inches silicon

508 wafer. In the next step, a 5  $\mu\text{m}$  polyimide layer (PI 2611, HD Microsystems) was spun on the

509 wafer and cured at 350°C. The lower platinum electrode contacts and tracks were then

510 sputtered and lift-off structured. Another 10  $\mu\text{m}$  polyimide layer was deposited, followed by

511 the upper platinum electrode tracks and contacts, which were sputtered and lift-off structured,

512 followed by a final 5  $\mu\text{m}$  polyimide layer for insulation. To reach the contacts on the lower

513 side, the silicon wafer was etched from the backside using reactive ion etching. In a second

514 reactive ion etching step, the lower electrode contacts were opened using the previously

515 deposited platinum layer as etch mask. An aluminum etch mask was then deposited on the

516 top side and used for reactive ion etching of the polyimide to open the contacts on the upper

517 side. After removal of the aluminum mask, the microfabrication process was completed, and

518 the separated double-sided electrode arrays were removed from the wafer using tweezers.

519 The electrode contacts were coated with microrough platinum using electroplating from an

520 aqueous solution of hexachloroplatinic acid (Poppendieck et al., 2014). This reduced the

521 electrode impedance by about one order of magnitude so that the resulting values of

522 impedance spectroscopy were  $\sim 10\text{ k}\Omega$  at 1 kHz. A plug (Harwin M50-4902045 connector)

523 was soldered to the adapter as the interface with external hardware. Each electrode array was



524 inserted into a hypodermic needle with the bevel smoothed with a laser (PICCO LASER,  
525 O.R. Lasertechnologie, DE).

### 526 *Subjects*

527 Three healthy men (age range: 29 - 39 years) participated in the experiment, which  
528 was approved by the Ethical Committee of the University Medical Center of Göttingen and  
529 conducted according to the Declaration of Helsinki (2008).

### 530 *Experimental procedure*

531 The subject was seated in the chair of a Biodex System 3 (Biodex Medical Systems  
532 Inc., NY, USA) with the right leg and foot stably fixated. He was asked to perform two brief  
533 maximal voluntary contractions with 5 minutes interval in between to recover from fatigue.  
534 The peak of the two was considered as the maximal voluntary contraction (MVC). Electrode  
535 array placement followed 5 extra minutes of rest. The skin was cleaned with alcohol and the  
536 thin-film electrode array(s) were inserted into the middle of the proximal half of the tibialis  
537 anterior muscle, perpendicular to the skin with the tip of the needle to a depth of 2.5 cm  
538 below the fat layer as estimated by ultrasound (Telemed Ltd. Vilnius, Lithuania). The two  
539 electrode arrays in S1 were about 3 and 1 cm distant in the longitudinal and perpendicular  
540 direction of the muscle, respectively.

541 Intramuscular EMG signals were recorded with a multichannel amplifier (EMG-  
542 USB2, OT-Bioelettronica, Torino, Italy) with a gain of 200-500, and band-pass filtered (8th  
543 order Bessel filter, high-pass cut-off frequency 10-100; low-pass cut-off frequency 4400 Hz),  
544 before being sampled at 10 kHz, using a 12-bit A/D converter. The EMG signals were  
545 acquired in a unipolar derivation with reference and ground electrodes at the ankle.

546           The subject was then asked to perform a brief contraction at 20 and 30% MVC during  
547 which the experimenters judged the signal quality. Following these trials, S1 was asked to  
548 perform a steady contraction at 20% MVC, whereas S2 and S3 were given 30% MVC as the  
549 target force level. Subjects were asked to perform a steady contraction lasting at least 1 min.  
550 The subject was provided with real-time force feedback displayed on a screen. The target  
551 force level was represented as straight line on the computer screen and the force exerted by  
552 the subject as a running dot. The subject was instructed to keep the position of the dot as  
553 close as possible to the straight line. He was allowed to complete the 1 min contraction at  
554 once or in multiple contractions with rest at will in between.

#### 555 *Signal quality assessment*

556           EMG signals were bandpass-filtered in the bandwidth 100-4400 Hz (third-order  
557 Butterworth, zero-lag filter) so that the frequency content was the same for all signals. We  
558 quantified the baseline noise as the average across 160 channels (4 electrode arrays x 40  
559 channels / array) of the root-mean-square of a 4 s segment of data recorded at rest.

#### 560 *Signal decomposition*

561           The recorded signals were independently manually and automatically decomposed  
562 into the constituent MU action potential trains by two expert investigators (SM and AH,  
563 respectively). In both cases, signals were high pass filtered at 250 Hz prior decomposition. In  
564 case of manual decomposition, intramuscular EMG signals from each thin-film array were  
565 decomposed using the decomposition software EMGLAB (McGill et al., 2005), that relies on  
566 spike sorting to detect MU action potentials. Each channel was decomposed independently  
567 and the series of discharges of a single MU were manually edited for resolving missed  
568 discharges and superimpositions. This process was conducted for each MU identified from  
569 the same channel until the residual signal, obtained by subtracting all averaged MU action

570 potentials from the raw signal, was comparable in power with the raw signal baseline noise,  
571 indicating that all MU activity had been accounted for. As the same MU could be detected in  
572 adjacent channels, the decomposition results from all channels were then merged by  
573 automatically identifying the MUs detected at more than one electrode. Discharge patterns  
574 with more than 75% discharges closer than 1 ms were considered to belong to the same MU  
575 identified on different channels. Differences in the discharge patterns of the same MU  
576 extracted from different channels were examined and resolved by the investigator in charge,  
577 so that at the final stage of the manual decomposition, each MU was represented by a unique  
578 firing pattern.

579 A second investigator (AH), automatically decomposed the 20 s signals using the  
580 convolution kernel compensation algorithm (CKC) (Holobar and Zazula, 2007). To briefly  
581 summarize the algorithm working principle, assuming absence of noise, we can express the  
582 intramuscular EMG signal  $x_c(k)$  recorded at channel  $c$  as the sum of trains of action potentials  
583 (one train for each active MU):

$$584 \quad x_c(k) = \sum_{i=1}^M \sum_{l=0}^{L-1} h_{ci}(l) \sum_r \delta(k - \phi_{ir} - l), \quad k = 0, \dots, f_s T \quad (\text{eq. 1})$$

585 where  $f_s$  is the sampling frequency,  $T$  the signal duration,  $h_{ci}(l)$  is the action potential of the  
586  $i$ -th MU as recorded at the  $c$ -th channel,  $\sum_r \delta(k - \phi_{ir})$  the spike train of the  $i$ -th MU with  
587 spikes at times  $\phi_{ir}$ ,  $L$  the duration of the action potentials, and  $M$  the number of active MUs.

588 Equation 1 can be re-written in matrix form as follows:

$$\underline{x}(k) = \sum_{l=0}^{L-1} \underline{H}(l) \underline{s}(k-l) \quad \text{with } s_i(k) = \sum_r \delta(k - \phi_{ir}). \quad (\text{eq. 2})$$

589  
590 Once the mixing matrix  $\underline{H}$  is identified, the source pulse trains can be extracted by  
591 multiplying the EMG signals ( $\underline{x}$ ) by the inverse of  $\underline{H}$  (unmixing matrix). The reliability of the

592 automatic decomposition was assessed by the pulse-to-noise ratio, which is a signal-based  
593 metric that has been validated to assess the decomposition accuracy of BSS-based  
594 decomposition algorithms (Holobar et al., 2014).

#### 595 *Assessment of the decomposition accuracy*

596 For each electrode array (3 subjects, 4 arrays), we report the number of MUs identified by the  
597 manual and automatic decomposition, and those commonly identified by both approaches.  
598 We first inspected the results of the manual decomposition. We calculated the RoA (Holobar  
599 et al., 2010) between each pair of MU firing patterns identified from the same 40 channel  
600 array, to ensure that they were unique. The RoA was defined as the ratio between the number  
601 of discharges that were present in both firing patterns (common) and the sum of the number  
602 of common discharges and the number of discharges present in only one of the two firing  
603 patterns. A tolerance of 10 sample ( $< 1$  ms) was used when identifying common discharges.

604 Each MU firing pattern was accurately estimated from the comparison between the  
605 firing patterns of that MU in multiple channels. To assess the robustness of the estimation, we  
606 calculated the multichannel MU action potentials by spike triggered averaging (Farina et al.,  
607 2002), i.e., by averaging the EMG of each channel using the discharges obtained from  
608 decomposition as a trigger. For each MU, we then counted the number of channels where the  
609 peak-to-peak amplitude of the action potential was greater than 10 times the average RMS of  
610 the baseline noise across the 40 channels. The higher the number of channels exceeding the  
611 threshold, the higher the likelihood that the firing pattern was accurately estimated (Mambrito  
612 and De Luca, 1984).

613 The RoA was also used to check whether there were MUs in common between array  
614 1 and array 2 of S1. As a further check, we performed cross-spike triggered averaging by  
615 averaging the EMG of each channel of array1 (array2) using the discharges obtained from

616 decomposition of the EMG from array2 (array1) as a trigger. A temporal support of 20 ms  
617 (centered about the MU firing) was used in the spike triggered averaging procedure to  
618 account for the propagation delay between the position of the electrode arrays, which were  
619 about 3 cm apart. For MUs in common between the two arrays, the cross-averaging  
620 procedure will yield an action potential with higher amplitude than the baseline noise.

621 We then compared the MU firing patterns extracted by the two decomposition  
622 procedures (manual and automatic). Here RoA was defined as the ratio between the matched  
623 discharges resulting from the comparison of the two procedures and the sum of matched and  
624 unmatched discharges. Discharge patterns with more than 75% discharges closer than 0.5 ms  
625 were considered to belong to the same MU identified by the manual and automatic procedure  
626 (common MU).

#### 627 *MU population coherence*

628 The discriminated spike trains were used to compute spectral coherence between groups of  
629 MUs, with numerosity ranging from 1 to half of the maximum number of extracted MUs. The  
630 allocation of MUs into groups was repeated 25 times for each group size (i.e., 1, 2, 3, ... MU  
631 spike trains) and the average coherence across the 25 repetitions was calculated. For each  
632 MU, spike trains were represented with binary vectors of 0 and 1, with 1 indicating the  
633 occurrence of a discharge. Within each MU group, the spike trains were summed to provide a  
634 cumulative spike train. Coherence analysis was performed on 0.5 s non-overlapping Hanning  
635 windows of the cumulative spike trains with a length of the Fast Fourier Transform equal to  
636 the sampling rate. To define the significance threshold for coherence peaks, the confidence  
637 level CL was calculated as (Rosenberg et al. 1989):

$$638 \quad CL = 1 - (1 - \alpha)^{\frac{1}{N-1}} \quad (\text{eq. 3})$$

639

640 where  $N$  and  $\alpha$  represent the number of segments used in the coherence calculation (data  
641 length/number of windows) and the confidence level (95%), respectively.

### 642 *Connectivity among motoneurons*

643           Connectivity among MNs was estimated by the cross-histogram of the discharge of  
644 pairs of MUs (1 ms resolution). To consider the opposing views on the distribution of  
645 recurrent inhibition between early- and late-recruited MUs within the homonymous MN pool  
646 (Granit et al., 1957; Haase et al., 1975; Hultborn et al., 1988), we investigated separately  
647 higher and lower threshold MUs. MUs were ordered by firing rate based on the fact that at a  
648 given force, earlier recruited MUs discharge faster than later recruited ones (De Luca and  
649 Erim, 1994). As control conditions, we generated 4 types of firing patterns with the same  
650 number of discharges as the detected MUs in the same time interval and *i*) uniformly  
651 distributed discharge times, *ii*) equal inter-spike intervals, *iii*) discharged times obtained from  
652 the experimental ones by applying a time shift of 0 to 70 ms to the whole MU action potential  
653 train (different for the different MUs, but the same for all action potentials of the same MU),  
654 and *iv*) discharged times obtained from the experimental ones by adding or subtracting a time  
655 in the range of 0 to 10% of the average inter-spike interval for each MU (different time shifts  
656 for each individual action potential).

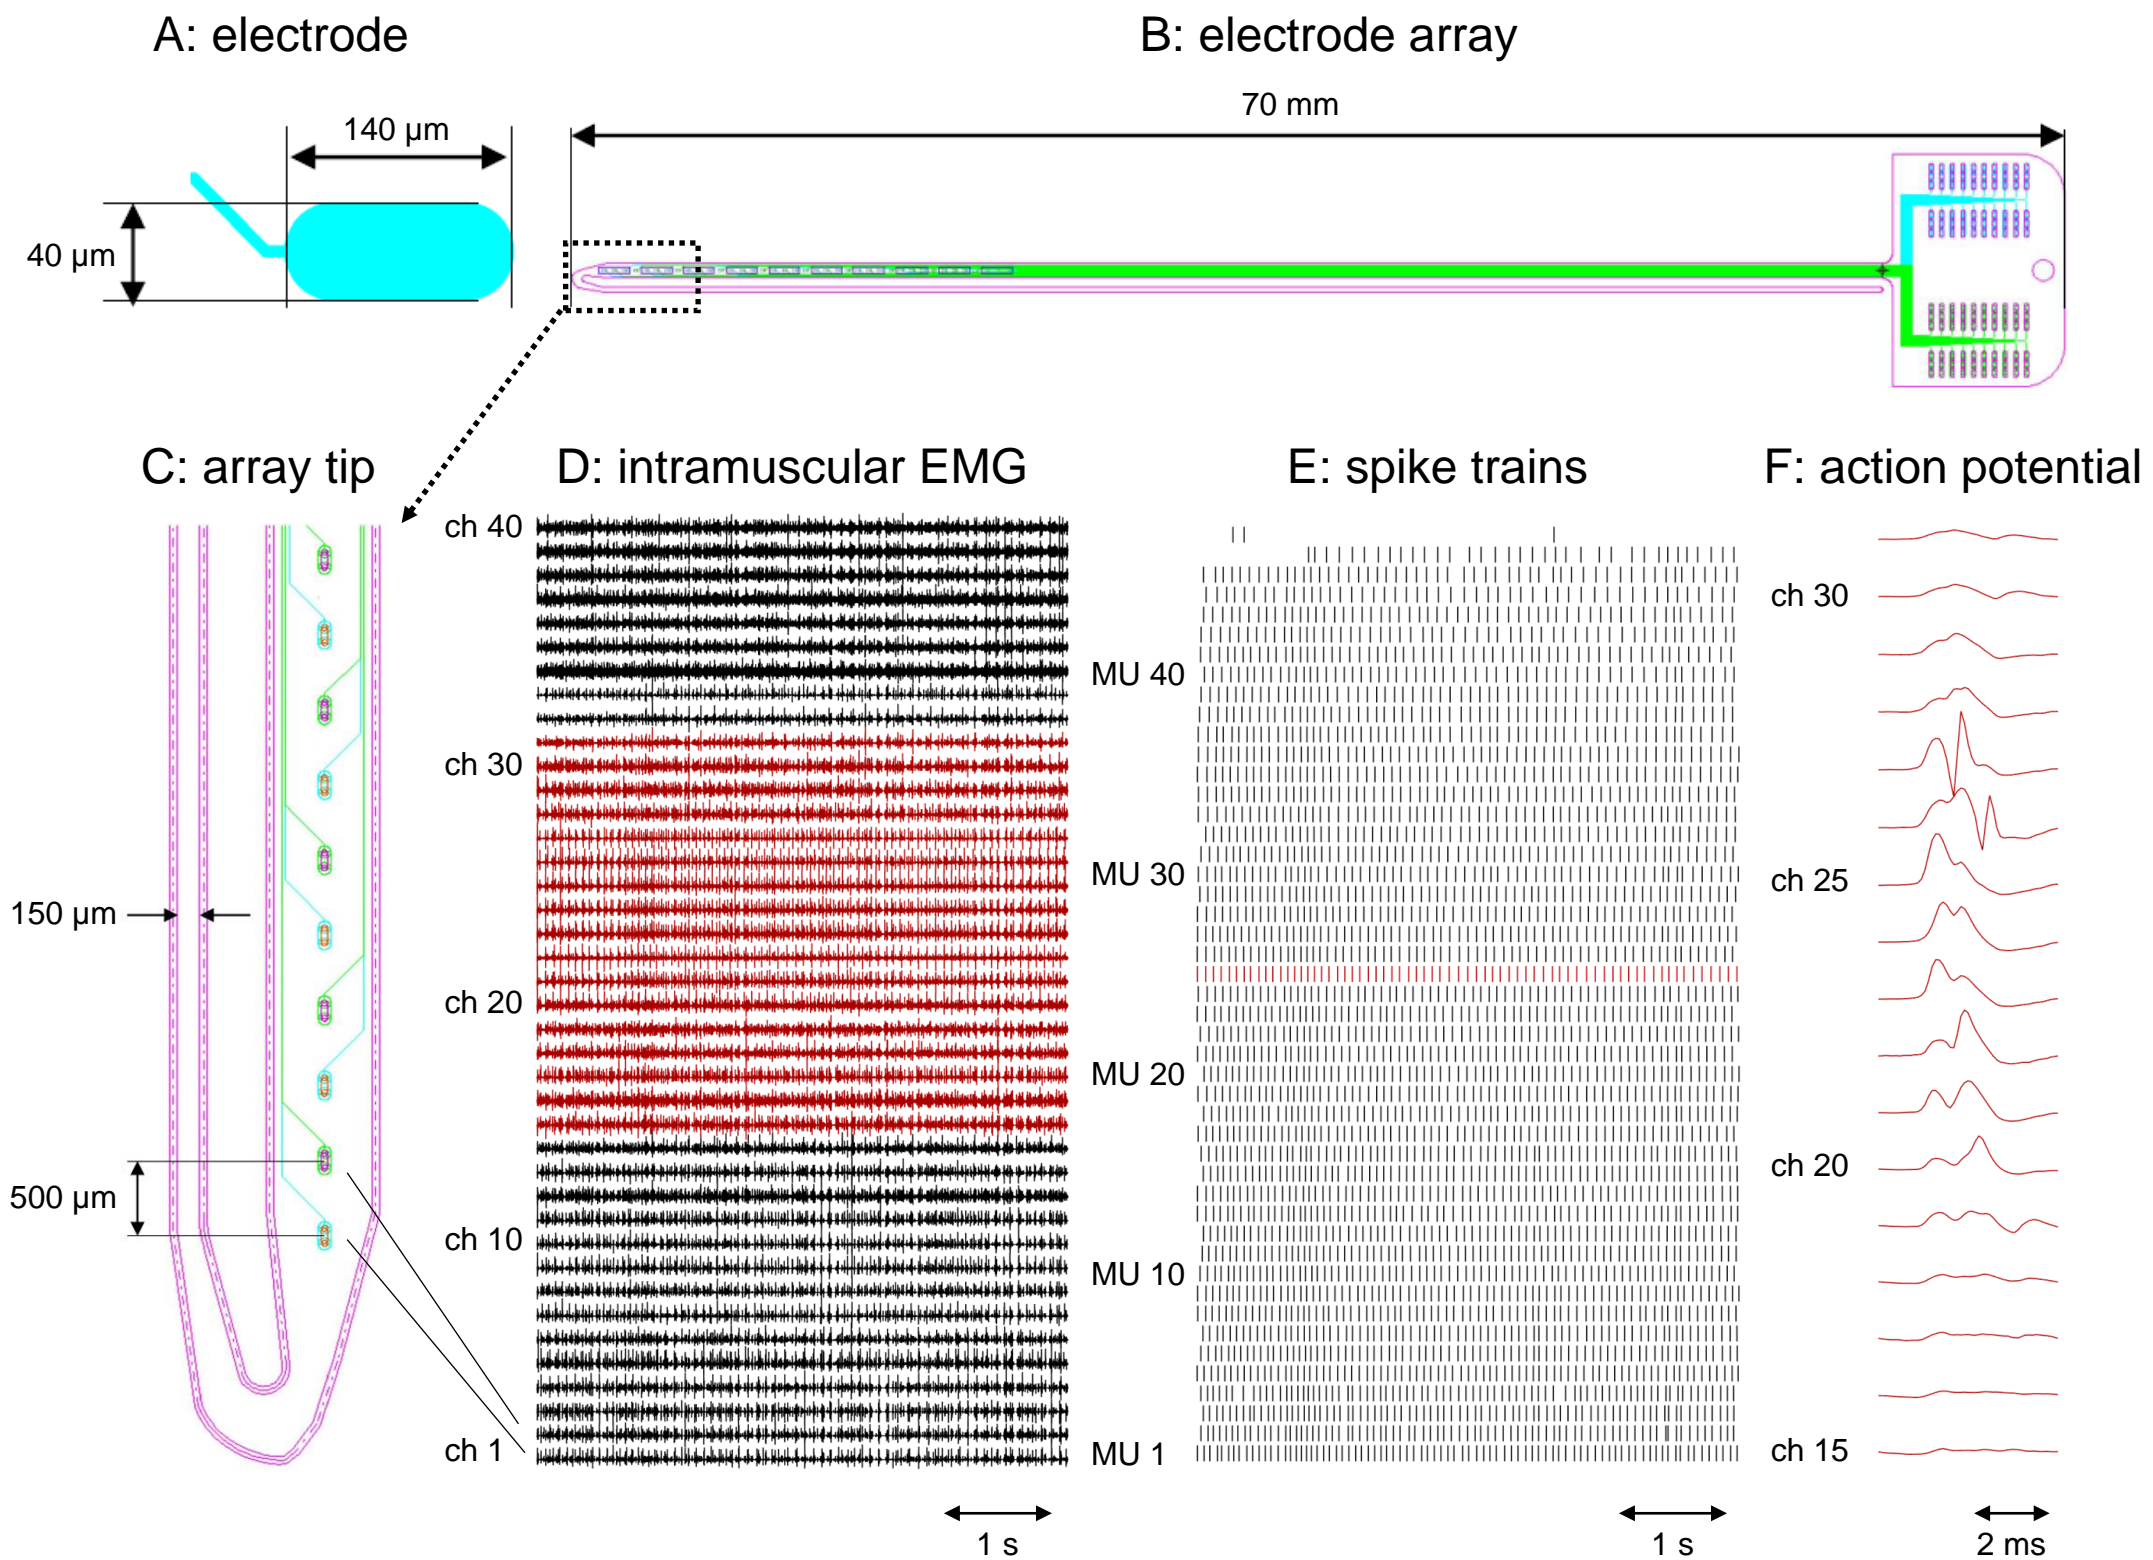

Fig 1

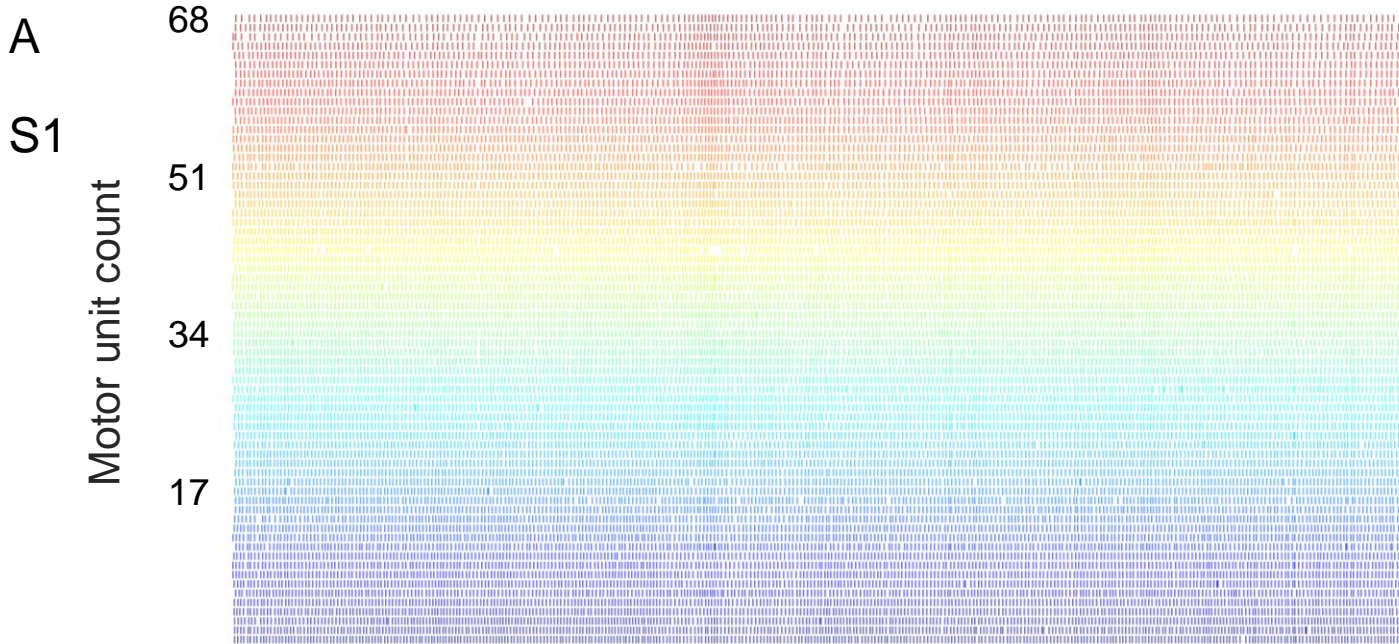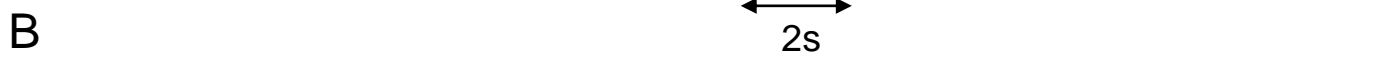

bioRxiv preprint doi: <https://doi.org/10.1101/2022.01.29.478247>; this version posted January 30, 2022. The copyright holder for this preprint (which was not certified by peer review) is the author/funder. All rights reserved. No reuse allowed without permission.

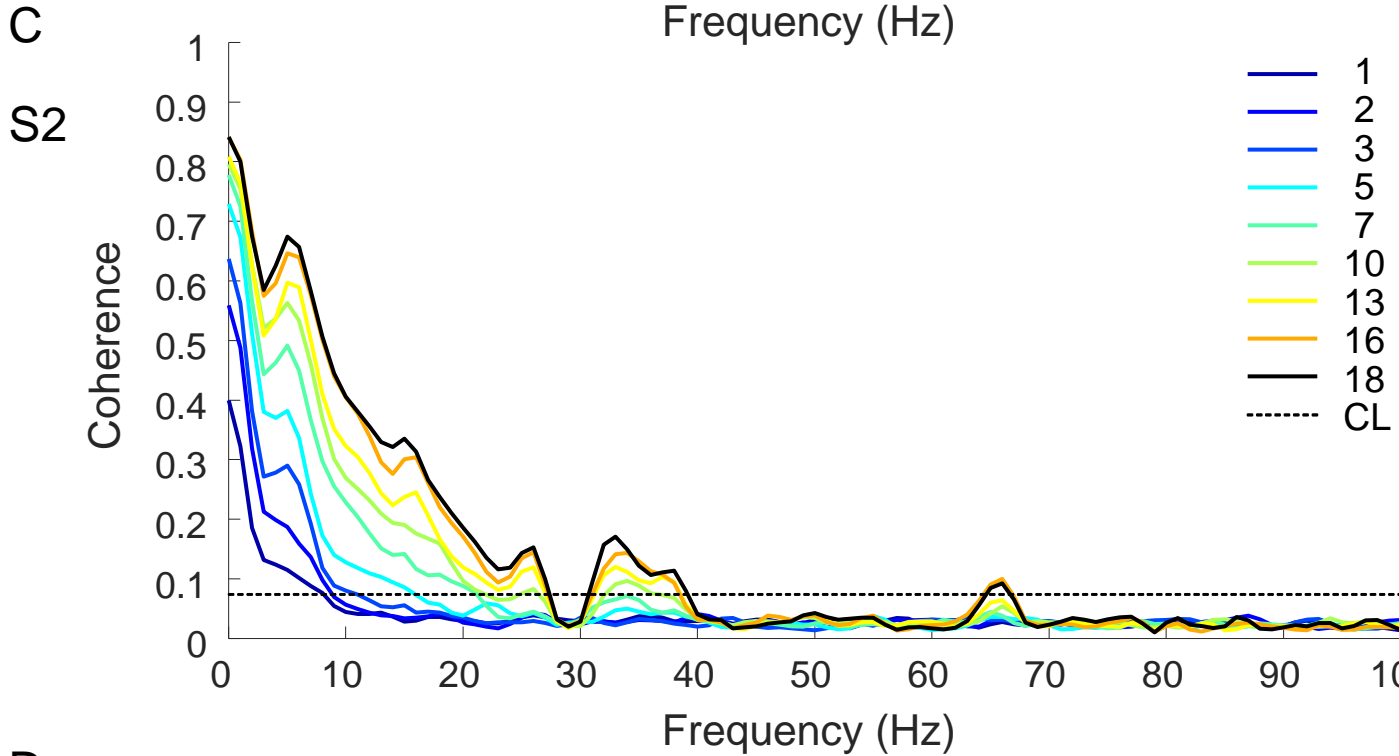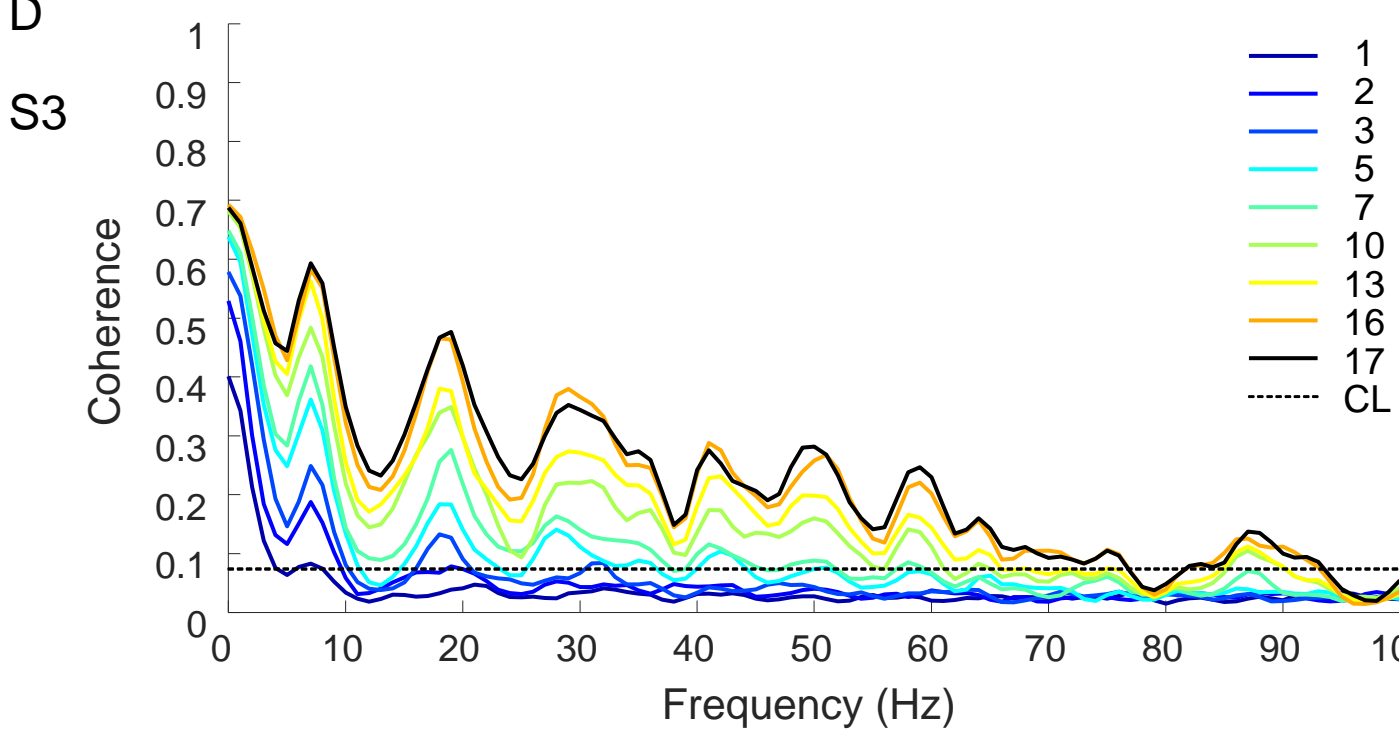

Fig 2



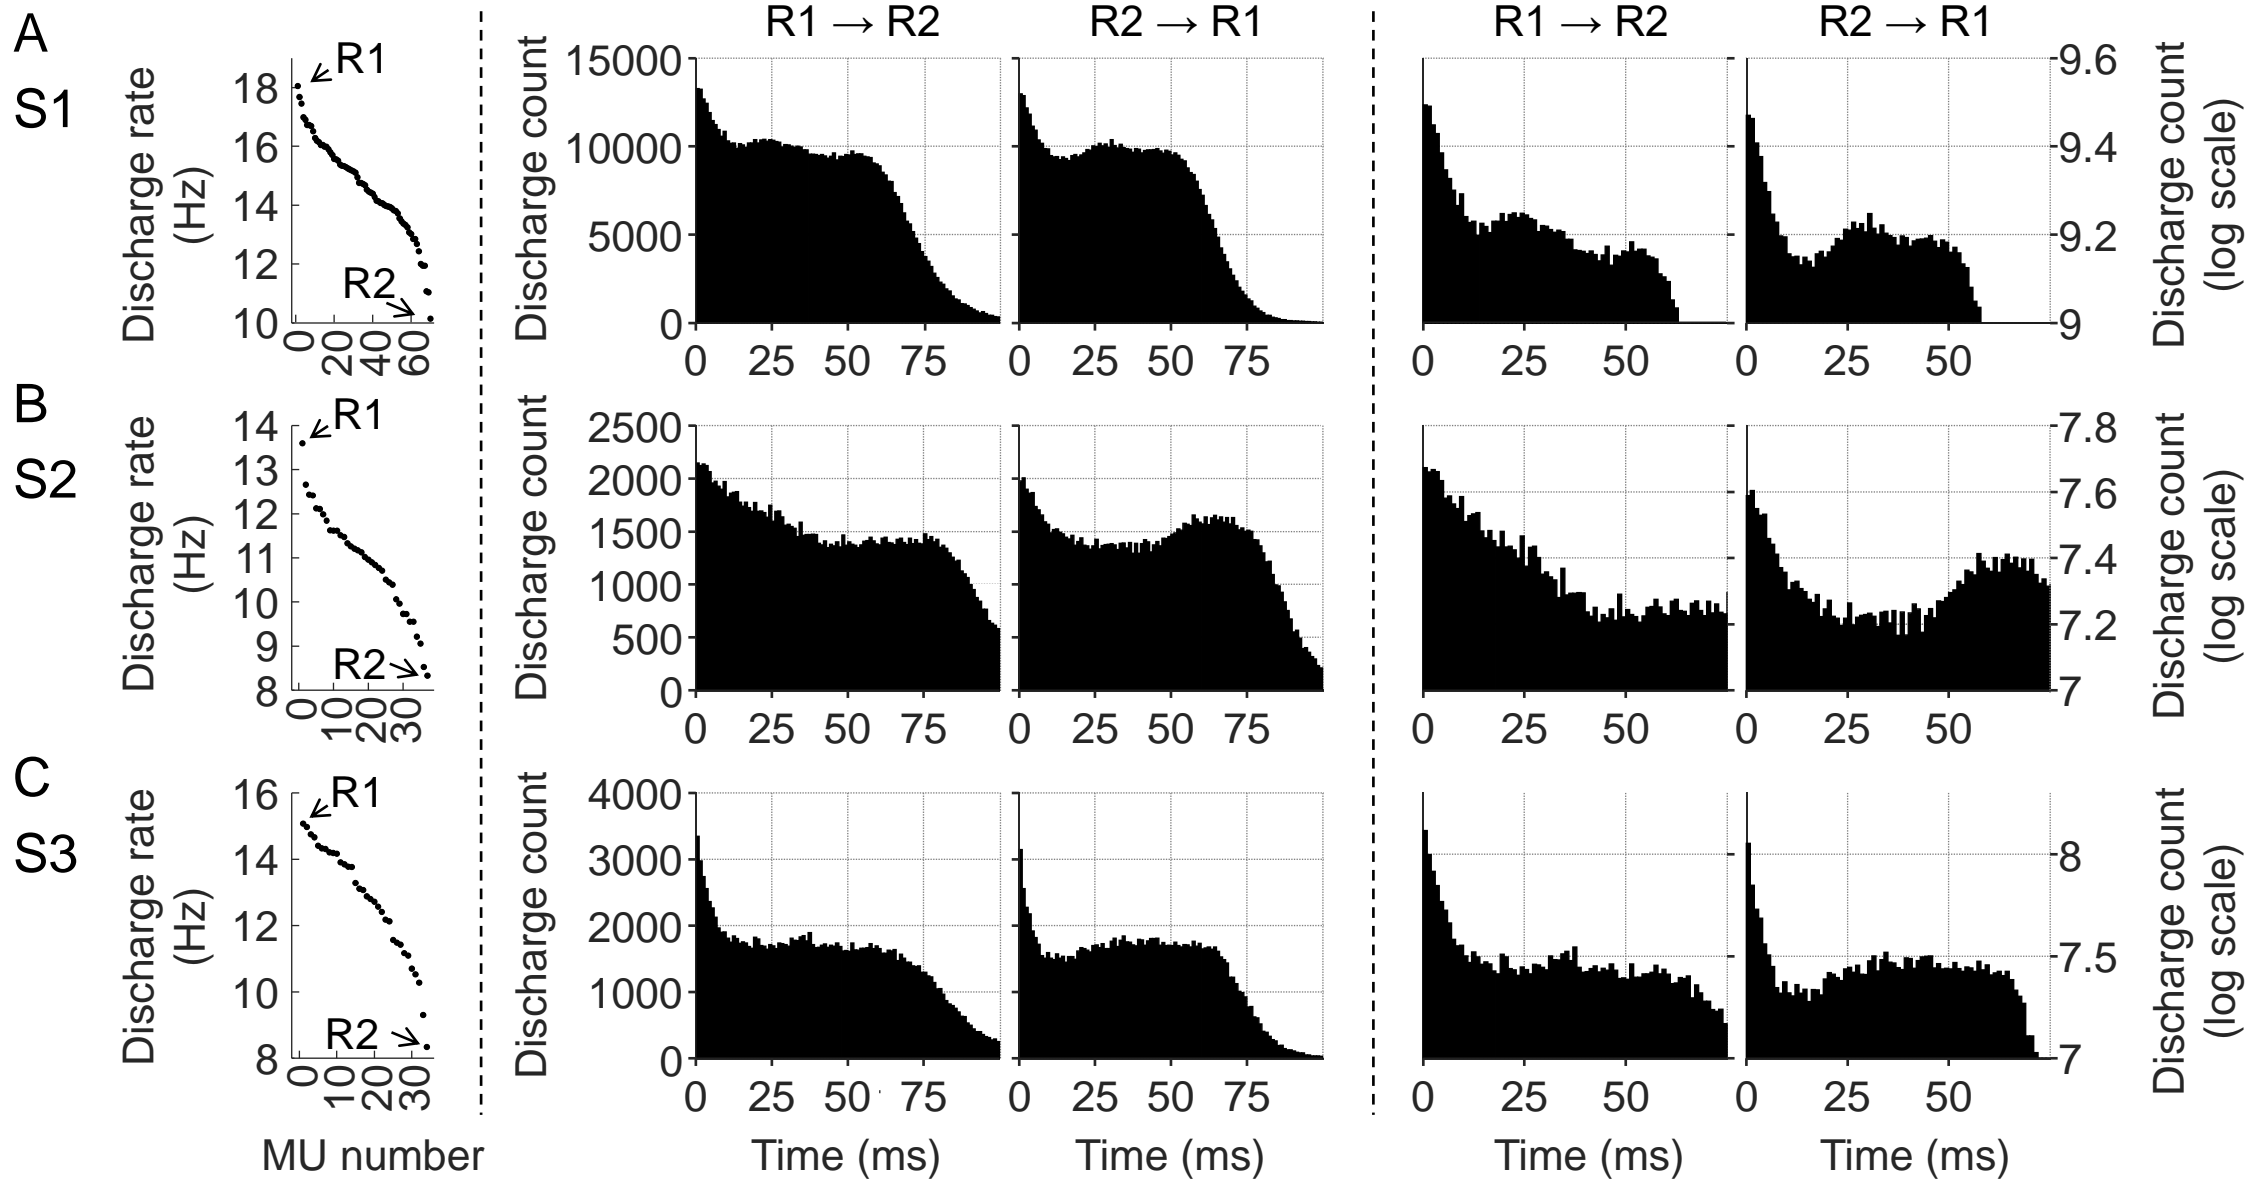

Fig 3
